# Supplementary material for: A Multi-Criteria Decision Analysis of Open-Skill Exercise-Based Sports for Cognitive Health Promotion in Older Adults
Source: Research Square preprint supplement (doi:10.21203/rs.3.rs-8671463/v1), 2026-02-04
Supplement: Supplementary file 1 [file 5d5a01e27ae15166f643f27a.docx]

**SUPPLEMENTARY MATERIALS**

**Supplementary Methods: Details of the Evaluation Criteria and Scoring Framework**

Each open-skill exercise (OSE) was evaluated using eight predefined criteria, grouped into four conceptual domains:

Domain A: Intrinsic features

- Criterion 1: Cognitive demand
- Criterion 2: Physical demand and exercise intensity
- Criterion 3: Safety
- Criterion 4: Social interaction

Domain B: Implementation feasibility

- Criterion 5: Facility and cost demand
- Criterion 6: Instructor and operational demand

Domain C: Sustainability and attractiveness

- Criterion 7: Continuity, enjoyment, and personal cost

Domain D: Digital extensibility

- Criterion 8: Applicability to virtual reality (VR) and e-sports environments

Together, these domains collectively encompass the cognitive, physical, safety-related, social, operational, sustainability, and technological aspects of OSE participation. To integrate these heterogeneous dimensions, we employed a multi-criteria decision analysis (MCDA) framework [25,26], providing a transparent, reproducible, and objective basis for quantitative comparison across sports.

All numerical variables for Criteria 1–8 were normalized to a 0–1 range using min–max scaling, with a small constant (ε = 0.01) added to ensure numerical stability. For Criterion 1 (cognitive demand), two components—Cognitive Breadth (CB) and Decision Intensity (DI)—were independently normalized and combined multiplicatively to generate a composite cognitive demand score (CCD), capturing both breadth and intensity of real-time cognitive engagement. Criterion 3 (safety) used inverted scaling to account for higher injury risk reducing safety. All other criteria (physical demand, social interaction, facility and cost demand, instructor and operational demand, continuity/enjoyment/personal cost, and VR/e-sports applicability) were normalized using standard min–max scaling. This approach allows all eight criteria to be directly compared on a uniform scale while preserving criterion-specific characteristics. The constant ε was introduced solely to prevent zero values and did not materially affect the relative ranking of sports. Detailed descriptions of the eight criteria and their scoring procedures are provided below.

**Criterion 1: Cognitive Demand**

Cognitive demand was conceptualized as the level of real-time cognitive engagement required during sport. It was assessed through two complementary components: CB and DI.

1. **CB**

CB reflects the diversity and simultaneity of cognitive processes recruited during sport performance. CB was quantified as the cumulative score across six core cognitive domains that are consistently implicated in open-skill activities [27–33]:

**CB Domain 1. Perceptual–Attentional Control** [30,32]**:**
The capacity to perceive and prioritize relevant visual, auditory, or kinesthetic cues while maintaining situational awareness and adjusting focus in rapidly changing environments.

Qualitative Reference Levels:

1. Attention directed to a single static or highly predictable cue in a stable and low-demand environment.
2. Selective attention to one moving target or cue with minimal distractors and predictable motion.
3. Alternating attention between a few relevant cues under moderately changing conditions.
4. Rapid attention shifts across multiple moving elements (e.g., object trajectories or players’ movements) in contexts with competing visual cues.
5. Continuous divided attention and prioritization across numerous dynamic elements, including simultaneous tracking of teammates, opponents, and moving objects in unpredictable, fast-changing environments.

**CB Domain 2. Processing Speed and Reactive Adaptation** [30,33]**:**
The ability to rapidly interpret sensory input and produce timely motor responses to unpredictable events or opponent behaviors.

Qualitative Reference Levels:

1. Responses are pre-planned and occur in a slow, predictable environment with minimal time pressure.
2. Occasional reactive adjustments to predictable stimuli with sufficient response time.
3. Moderate reaction speed required to adapt to variable trajectories or opponent actions under moderate time constraints.
4. High-speed perception–action coupling with rapid, accurate responses to unpredictable changes.
5. Continuous ultra-fast perception–action cycles under intense time constraints (often within sub-second windows).

**CB Domain 3. Executive and Strategic Control** [27,28]**:**
Higher-order cognitive processes that regulate planning, inhibition, working memory, and adaptive strategy formulation during gameplay.

Qualitative Reference Levels:

1. Performs predetermined or well-rehearsed actions with minimal need for planning, inhibition, or adjustment.
2. Occasionally modifies or inhibits a planned action based on simple or predictable cues, with limited requirement for strategic change.
3. Selects among a limited set of tactical options based on immediate situational feedback or opponent behavior, requiring basic working memory and inhibition control during active performance.
4. Frequently revises action strategies in real time according to evolving situational demands, requiring rapid updating of working memory and effective suppression of prepotent responses.
5. Engages in continuous, high-level strategic reasoning—simultaneously evaluating multiple tactical alternatives, prioritizing goals, and flexibly adapting plans in unpredictable and fast-changing contexts.

**CB Domain 4. Visuospatial Awareness and Anticipation** [32]**:**
The ability to interpret spatial relationships, predict trajectories, and coordinate perception with movement in three-dimensional space.

Qualitative Reference Levels:

1. Spatial layout and object locations remain constant and easily predictable; minimal spatial transformation required.
2. Tracks a single moving object or opponent within a limited and predictable spatial range.
3. Anticipates object or opponent trajectories based on observed motion patterns, requiring moderate spatial updating.
4. Integrates multiple moving elements and spatial trajectories in real time, coordinating continuous spatial awareness with movement adjustments.
5. Maintains continuous multidirectional spatial prediction and rapid recalibration of position and movement in complex, fast-changing environments involving multiple interacting players or objects.

**CB Domain 5. Decision-Making and Tactical Reasoning** [29,31]**:**
The real-time selection of optimal actions through prediction, anticipation, and contextual evaluation in complex, time-pressured settings.

Qualitative Reference Levels:

1. Executes a single pre-determined response pattern; no need for situational choice or adaptation.
2. Makes simple, binary choices (e.g., go/no-go, left/right) based on clear and immediate cues.
3. Chooses among several tactical options using contextual cues, requiring situational awareness and short-term anticipation.
4. Makes rapid, multi-criteria decisions under time pressure, integrating opponent behavior, spatial configuration, and predicted outcomes.
5. Performs high-frequency, context-dependent tactical reasoning, involving continuous anticipation, probabilistic prediction, and simultaneous evaluation of multiple alternatives.

**CB Domain 6. Multitasking and Cognitive Flexibility** [33]**:**
The capacity to simultaneously manage multiple cognitive–motor tasks and flexibly shift attention according to changing situational demands.

Qualitative Reference Levels:

1. Performs a single, continuous cognitive–motor task with a stable focus and no need for task switching or attention shifting.
2. Occasionally shifts between simple task sets or attention targets with sufficient transition time and minimal interference.
3. Alternates between multiple subtasks or goals under moderate cognitive load, requiring controlled switching and basic flexibility.
4. Manages several concurrent cognitive–motor processes with rapid switching, updating, and temporary prioritization under time constraints.
5. Continuously integrates overlapping tasks and flexibly reallocates attention and resources in real time under high-pressure, unpredictable conditions.

Each sport was assigned ordinal scores (1–5) for each cognitive domain based on qualitative reference levels, and the total CB score was calculated as the sum across all six domains. Normalized CB scores were calculated as:

where represents the normalized cognitive domain engagement for sport .

The small constant was added to ensure numerical stability.

1. **DI**

DI represents the temporal density of decision-making demands imposed on an individual participant during active play. As an empirical operationalization of decision intensity (DI), Decision Frequency per Minute (DPM) was used and defined as the estimated number of discrete perceptual–cognitive–motor decisions executed per minute of engagement.

DPM estimates were derived from published notational and time–motion analyses across eight representative sports (tennis, table tennis, badminton, basketball, volleyball, soccer, baseball, and non-combat judo). Data on rally duration, possessions, shot frequency, or techniques were extracted from peer-reviewed studies and used to compute:

A “decision” was defined as any discrete action requiring a conscious tactical or technical choice (e.g., shot type, pass target, or technique selection). When team-level data were reported, the total was divided by the number of active players to estimate per-player DPM. In pair-based sports, each player was assumed to make approximately half of all observed actions. When necessary, estimates were interpolated using data from comparable sports in similar competitive contexts.

Normalized DPM scores were computed as:

where represents the normalized decision frequency for sport .

The small constant was added to ensure numerical stability.

DPM estimates are intended as approximate measures of decision-making frequency during active play. They were derived from empirical event dynamics reported in systematic reviews, comprehensive reviews, notational/match analyses, and league statistics. Below we summarize the calculation model and key assumptions applied to each sport. Accordingly, DPM should be interpreted as a comparative proxy of decision density rather than an exact measure of all cognitive decisions occurring during play.

1. **CCD**

The two normalized indices were integrated multiplicatively to yield a composite measure:

This formulation assumes that total cognitive load depends jointly on the breadth (CB′) and intensity (DI′) of cognitive engagement. Sports that demand diverse cognitive processing and frequent, rapid decision-making thus exhibit higher values.

Higher values indicate broader cognitive engagement.

**Criterion 2: Physical Demand and Exercise Intensity**

Physical demand was quantified using Metabolic Equivalent of Task (MET) values, primarily sourced from the Compendium of Physical Activities [48,49]. When multiple intensity levels were listed, all relevant entries were reviewed and the median MET was adopted as the representative intensity value. For sports not explicitly included, supplementary data from published studies were referenced [50–53]. When a MET value was unavailable (e.g., for baseball), the value for the most comparable activity (e.g., softball) was adopted. For non-combat judo, the MET for “martial arts, different types, slower pace, novice performers, practice” was adopted.

Normalized physical demand scores were calculated using min–max scaling:

Higher values indicate greater physical exertion or exercise intensity.

**Criterion 3: Safety**

Safety was evaluated using national epidemiological data from Japan, reporting sport-specific injury incidence rates across 40 major activities [54]. Although these rates represent activity-level rather than skill-specific risk, they provide an ecologically valid estimate of real-world injury probability in community sports contexts. Injury incidence data for kata judo are not available in national surveys. Therefore, its injury risk was conservatively approximated as one order of magnitude lower than that of competitive judo, based on established differences between competitive and practice-based settings reported in judo epidemiology.

Normalized safety scores were calculated via inverted min–max scaling:

where *​* denotes the normalized safety score for sport .

Higher *​* values correspond to lower injury risk (i.e., greater safety).

**Criterion 4: Social Interaction**

Social interaction was defined as the degree of interpersonal engagement inherent to the sport, encompassing teamwork, cooperation, and both verbal and non-verbal communication.

Qualitative Reference Levels:

1. Individual sport with minimal or no interaction.
2. One-on-one competition with limited communication.
3. Occasional cooperation within pairs (e.g., doubles).
4. Regular teamwork and communication within small or medium teams.
5. Continuous teamwork and dynamic coordination within large teams.

Normalized social interaction scores were calculated using min–max scaling:

Higher ​ values indicate stronger interpersonal communication and cooperative engagement.

**Criterion 5: Facility and Cost Demand**

Facility and cost demand reflects the combined requirements for specialized facilities, equipment, and operational costs necessary to implement each sport in community settings.

Qualitative Reference Levels:

1. Very high facility or equipment cost; difficult to implement.
2. Requires specialized facilities; moderate-to-high cost.
3. General gym or park use; moderate cost.
4. Easily implemented in public spaces; low cost.
5. Minimal requirements; feasible at home or in community settings.

Normalized facility and cost demand scores were computed using min–max scaling:

Higher ​​ values indicate easier and more cost-effective implementation.

**Criterion 6: Instructor and Operational Demand**

Instructor and operational demand refers to the extent of supervision, instruction, or support required for safe and sustainable implementation within community programs.

Qualitative Reference Levels:

1. Expert supervision always required.
2. Qualified instruction necessary for safety.
3. Basic instructor support sufficient.
4. Minimal supervision required; self-practice feasible.
5. Fully self-directed participation possible.

Normalized instructor and operational demand scores were calculated using min–max scaling:

Higher values indicate lower instructional and operational demands, facilitating easier community adoption.

**Criterion 7: Continuity, Enjoyment, and Personal Cost**

This dimension evaluates the sustainability of participation, balancing perceived burden, enjoyment, and personal financial cost.

Qualitative Reference Levels:

1. High burden and cost; low enjoyment.
2. Moderate difficulty or cost; barriers for beginners.
3. Moderate cost and learning; motivation via achievement.
4. Balanced enjoyment and cost; feasible continuation.
5. Low burden and cost; easily sustained participation.

Normalized continuity, enjoyment and personal cost scores were computed using min–max scaling:

Higher ​ values indicate lower personal burden and greater potential for sustained engagement.

**Criterion 8: Applicability to VR and e-sports Environments**

VR and e-sports applicability assesses the degree to which a sport can be digitally simulated while retaining its core cognitive and physical elements.

Qualitative Reference Levels:

1. Not digitally replicable.
2. Low replicability; limited simulation.
3. Moderate replicability; partial engagement.
4. High replicability; most aspects simulated.
5. Fully replicable with full cognitive and physical engagement.

Normalized VR applicability scores were calculated using min–max scaling:

Higher values indicate greater potential for digital replication and VR adaptation.
