# Supplementary material for: A Multi-Criteria Decision Analysis of Open-Skill Exercise-Based Sports for Cognitive Health Promotion in Older Adults
Source: Research Square preprint supplement (doi:10.21203/rs.3.rs-8671463/v1), 2026-02-04
Supplement: Supplementary file 2 [file ffbaf9f3f183b9a4af681964.docx]

**Table S1A.** CB Levels by OSEs.

| **Sport** | **CB score** | | | | | | **Total**  **CB score** | **Normalized**  **CB score** |
| --- | --- | --- | --- | --- | --- | --- | --- | --- |
| **Perceptual–Attentional Control** | **Processing Speed and Reactive Adaptation** | **Executive and Strategic Control** | **Visuospatial Awareness and Anticipation** | **Decision-Making and Tactical Reasoning** | **Multitasking and Cognitive Flexibility** |
| Tennis | 4 | 4 | 4 | 4 | 4 | 4 | 24 | 0.6157 |
| Table tennis | 4 | 5 | 5 | 4 | 4 | 4 | 26 | 0.7694 |
| Badminton | 4 | 5 | 5 | 4 | 4 | 4 | 26 | 0.7694 |
| Basketball | 5 | 4 | 5 | 5 | 5 | 5 | 29 | 1.0000 |
| Volleyball | 5 | 4 | 5 | 5 | 5 | 5 | 29 | 1.0000 |
| Soccer | 5 | 4 | 5 | 5 | 5 | 5 | 29 | 1.0000 |
| Baseball | 4 | 5 | 3 | 4 | 4 | 3 | 23 | 0.5388 |
| Non-combat Judo | 3 | 3 | 3 | 3 | 2 | 2 | 16 | 0.0008 |

Abbreviations: CB, Cognitive Breadth; OSE, Open-Skill Exercise.

**Table S1B.** Estimated DPM across OSEs (Empirical Basis for DI).

| **Sport** | **Estimated DPM** | **Normalized**  **DPM scores** | **Empirical Basis and Calculation Notes** |
| --- | --- | --- | --- |
| Tennis | 20.30 | 0.5906 | Based on the systematic review by Pluim et al. [34]: 1) Men: rally duration = 5.5 s → rallies/min ≈ 60/5.5 = 10.91; strokes per rally = 4.1 → strokes/min ≈ 10.91 × 4.1 = 44.8; assuming equal participation, DPM ≈ 22.4 decisions/min per player. 2) Women: rally duration = 6.4 s → rallies/min ≈ 60/6.4 = 9.38; strokes per rally = 3.9 → strokes/min ≈ 9.38 × 3.9 = 36.6; assuming equal participation, DPM ≈ 18.3 decisions/min per player.  3) Average of men and women: (22.4 + 18.3)/2 ≈ 20.3 decisions/min. |
| Table tennis | 34.30 | 1.0000 | Based on the study review by Zagatto et al. [35]:  rally duration ≈ 3.5 s → rallies/min ≈ 60/3.5 = 17.14; strokes per rally ≈ 4.0 → strokes/min ≈ 17.14 × 4.0 = 68.6; assuming equal participation, DPM ≈ 34.3 decisions/min per player. |
| Badminton | 26.40 | 0.7690 | Based on the systematic review by Winata et al. [36]:  1) Men: rally duration = 8.8 s → rallies/min ≈ 60/8.8 ≈ 6.82; strokes per rally = 8.9 → strokes/min ≈ 6.82 × 8.9 ≈ 60.7; assuming equal participation, DPM ≈ 30.4 decisions/min per player.  2) Women: rally duration = 9.3 s → rallies/min ≈ 60/9.3 ≈ 6.45; strokes per rally = 6.9 → strokes/min ≈ 6.45 × 6.9 ≈ 44.5; assuming equal participation, DPM ≈ 22.3 decisions/min per player.  3) Average of men and women: (30.4 + 22.3)/2 ≈ 26.4 decisions/min. |
| Basketball | 5.10 | 0.1462 | Based on Clemente et al. [37] and conceptual evidence from Courel-Ibáñez et al. [38]:  1) On-ball technical-tactical actions in 5×5 games ≈ 2.4 decisions/min per player.  2) Off-ball actions (e.g., screening, cutting, spacing) are less systematically quantified; based on conceptual considerations of decision-making in basketball, their frequency is assumed to be similar to or slightly higher than on-ball actions → off-ball ≈ 2.4–3.0 decisions/min per player.  3) Total DPM per player (median) ≈ 5.1 decisions/min. |
| Volleyball | 12.20 | 0.3538 | Based on data from the game dynamics study of Ðurković et al. [39]:  1) Average rally duration = 5.54 s → rallies/min ≈ 60/5.54 = 10.83.  2) Average ball contacts per rally = 6.76  3) 10.83 rallies/min × 6.76 contacts ≈ 73.2 decision-related events per minute (team).  4) Divided by 6 players on court = 73.2/6 ≈ 12.2 decisions/min per player.  Note: “Ball contacts” are used as proxies for decision-making actions (serve, receive, set, attack, block, dig). |
| Soccer | 1.93 | 0.0535 | Based on data from the physical match performance and movement analysis study of Bloomfield et al. [40] and Altmann et al. [41]:  1) On-ball purposeful movements per match per player ≈ 111 events.  2) Effective ball-in-play time per match ≈ 57.45 min → DPM (on-ball) ≈ 111 ÷ 57.45 ≈ 1.93 decisions/min per player.  3) Note: This estimate only accounts for on-ball movements recorded as purposeful movements. Off-ball decisions (positioning, pressing, tactical runs) are not included, and therefore this value likely underestimates the total decision-making demands in soccer. |
| Baseball | 0.11 | 0.0003 | Based on data obtained from the official websites of the Society for American Baseball Research [42] and Major League Baseball [43]:  1) Reported approximate pitches per team per game ≈ 148.  2) Average nine-inning game time ≈ 156 min (2 h 36 min).  3) Combined both teams: 148 × 2 = 296 pitches per game.  4) Pitches per minute (match total) = 296 ÷ 156 ≈ 1.90 events/min.  5) Per-team pitches per minute = 148 ÷ 156 ≈ 0.95 events/min.  6) Convert to per-player (divide by 9 on-field players per team): 0.95 ÷ 9 ≈ 0.105 → round ≈ 0.11 decisions/min per player.  Note: Because pitch events are the most reliably recorded and decision-relevant actions, pitch-based DPM is used as the representative value for baseball. |
| Non-combat Judo | 0.80 | 0.0205 | Based on the standardized and rule-governed technique sequences defined by the Kodokan [44] and formalized in International Judo Federation [45] and All Japan Judo Federation [46]:  1) A standard kata contains ≈ 15–20 distinct technical sequences (“waza units”), each requiring a deliberate transition, cue recognition, and coordinated execution.  2) A full kata demonstration typically lasts ≈ 12–15 minutes for a pair.  3) Approximate technique-transitions per minute (pair-level) ≈ (15–20) ÷ (12–15 min) ≈ 1.0–1.3 events/min.  4) Per performer (two-person kata) ≈ 0.5–0.65 events/min.  5) Rounded representative value (median) → ≈ 0.8 decisions/min per performer.  Note: Kata involves predefined sequences with high precision and minimal improvisation, so DPM reflects technical-transition decisions, not reactive decisions. This makes Judo-Kata comparable to other sports in a standardized cross-sport DPM framework. |

Abbreviations: DPM, Decision Frequency per Minute; DI, Decision Intensity; OSE, Open-Skill Exercise.

Note: (1) DPM values are approximate estimates based on representative match analyses and reviews. (2) For rally-based sports (e.g., tennis, table tennis, badminton), DPM was derived from rally duration and strokes per rally; for team and invasion sports (basketball, volleyball, soccer, baseball), from possession or action rates; and for non-combat judo, from techniques per performance duration.

**Table S1C.** CCD Scores across OSEs.

| **Sport** | **Total CB score** | **Normalized CB score** | **Estimated DPM score (DI)** | **Normalized DPM score (DI’)** | **CCD score** |
| --- | --- | --- | --- | --- | --- |
| Tennis | 24 | 0.6157 | 20.30 | 0.5906 | 0.364 |
| Table tennis | 26 | 0.7694 | 34.30 | 1.0000 | 0.769 |
| Badminton | 26 | 0.7694 | 26.40 | 0.7690 | 0.592 |
| Basketball | 29 | 1.0000 | 5.10 | 0.1462 | 0.146 |
| Volleyball | 29 | 1.0000 | 12.20 | 0.3538 | 0.354 |
| Soccer | 29 | 1.0000 | 1.93 | 0.0535 | 0.054 |
| Baseball | 23 | 0.5388 | 0.11 | 0.0003 | 0.000 † |
| Non-combat Judo | 16 | 0.0008 | 0.80 | 0.0205 | 0.000 † |

Abbreviations: CB, Cognitive breadth; OSE, Open-Skill Exercise; DPM, Decision Frequency per Minute; DI, Decision Intensity; CCD, Composite Cognitive Demand.

Note: (1) † CCD precise values before rounding: Baseball = 0.00016164; Non-combat Judo = 0.00001640. (2) DI is operationalized as the normalized DPM. (3) CCD was computed as the product of normalized CB and DI.

**Table S2.** Physical demand and Exercise intensity Scores across OSEs.

| **Sport** | **METs** | **Median MET Score** | **Normalized MET Score** |
| --- | --- | --- | --- |
| Tennis | 6.8 Tennis, general, moderate effort; 8.0 Tennis, general, competitive; 6.0 Tennis, doubles; 4.5 Tennis, doubles; 8.0 Tennis, singles; 5.0 Tennis, hitting balls, non-game play, moderate effort (Compendium [48])  mean 3.37 Tennis lesson (Kawakami et al. [50])  5.0 ± 0.2 Tennis game play (Scanlan et al. [51]) | 5.5 | 0.354 |
| Table tennis | 4.0 (Compendium [48])  mean 6.8 ± 2.0 [peak 11.2] Training sessions; mean 4.8 ± 1.4 [peak 9.6] Match play (Sperlich et al. [52])  mean 7.1 ± 3.2 Table tennis practice (Sagayama et al. [53]) | 5.8 | 0.425 |
| Badminton | 7.0 Badminton, competitive; 9.0 Badminton, competitive, match play; 5.5 Badminton, social singles and doubles, general (Compendium [48]) | 7.0 | 0.706 |
| Basketball | 8.0 Basketball, game; 6.0 Basketball, non-game, general; 7.5 Basketball, general; 7.0 Basketball, officiating; 5.8 Basketball, officiating; 5.0 Basketball, shooting baskets; 9.3 Basketball, drills, practice (Compendium [48]) | 7.0 | 0.706 |
| Volleyball | 4.0 Volleyball; 6.0 Volleyball, competitive, in gymnasium; 3.0 Volleyball, non-competitive, 6-9 member team, general; 8.0 Volleyball, beach, in sand (Compendium [48]) | 5.0 | 0.237 |
| Soccer | 9.5 Soccer, competitive; 7.0 Soccer, casual, general (Compendium [48]) | 8.25 | 1.000 |
| Baseball | 4.0 Softball, practice; 4.0 Softball, officiating; 6.0 Softball, pitching (Compendium [48]) | 4.0 | 0.002 |
| Non-combat Judo | 5.3 Martial Arts, different types, slower pace, novice performers, practice (Compendium [48]) | 5.3 | 0.307 |

Abbreviations: OSE, Open-Skill Exercise; MET, Metabolic Equivalent of Task.

**Table S3.** Safety Scores across OSEs.

| **Sport** | **Injury Incidence Rate (%)** | **Normalized Safety Score** |
| --- | --- | --- |
| Tennis | 3.06 | 0.471 |
| Table tennis | 1.15 | 0.872 |
| Badminton | 2.71 | 0.544 |
| Basketball | 4.90 | 0.084 |
| Volleyball | 4.09 | 0.254 |
| Soccer | 3.61 | 0.355 |
| Baseball | 5.29 | 0.002 |
| Non-combat Judo | 0.54 | 1.000 |

Abbreviations: OSE, Open-Skill Exercise.

**Table S4.** Social Interaction Scores across OSEs.

| **Sport** | **Score** | **Normalized Score** | **Rationale/Comment** |
| --- | --- | --- | --- |
| Tennis | 3 | 0.005 | Singles or doubles; doubles involve regular cooperation and communication, moderate social engagement. |
| Table tennis | 3 | 0.005 | Singles or doubles; doubles involve regular cooperation and brief communication, moderate social engagement. |
| Badminton | 3 | 0.005 | Singles or doubles; doubles require cooperative positioning and communication, moderate social engagement. |
| Basketball | 4 | 0.502 | Small-team sport requiring regular teamwork, coordination, and communication among players. |
| Volleyball | 4 | 0.502 | Medium-team sport requiring ongoing coordination and verbal cues among teammates. |
| Soccer | 5 | 1.000 | Large-team sport requiring continuous teamwork, dynamic communication, and strategic coordination. |
| Baseball | 4 | 0.502 | Large-team sport that does not require continuous teamwork, dynamic communication, or coordination throughout play. |
| Non-combat Judo | 3 | 0.005 | Performed in pairs; cooperative timing, balance, and synchronization are essential, resembling pair-based interaction in doubles sports. |

Abbreviations: OSE, Open-Skill Exercise.

**Table S5.** Facility and Cost Demand Scores across OSEs.

| **Sport** | **Score** | **Normalized Score** | **Rationale/Comment** |
| --- | --- | --- | --- |
| Tennis | 3 | 0.336 | Requires a standard tennis court and racket; moderate operational cost; playable in community or club facilities. |
| Table tennis | 5 | 1.000 | Minimal space and equipment required; can be performed in small indoor spaces; very low operational cost. |
| Badminton | 4 | 0.668 | Requires indoor court and racket/shuttlecock; low-to-moderate operational cost; commonly available in community gyms. |
| Basketball | 3 | 0.336 | Requires a court, basketballs, and basic hoops; moderate operational cost; accessible in many community facilities. |
| Volleyball | 4 | 0.668 | Court and net required; low-to-moderate operational cost; can be played indoors or outdoors in community settings. |
| Soccer | 3 | 0.336 | Needs a field and balls; moderate maintenance and operational cost; commonly available in parks. |
| Baseball | 2 | 0.003 | Requires a large field, bats, balls, gloves; higher operational and equipment costs; more difficult to implement in small community spaces. |
| Non-combat Judo | 4 | 0.668 | Minimal facility requirements (tatami mats); low equipment cost; suitable for dojo or gym settings; operational cost is low. |

Abbreviations: OSE, Open-Skill Exercise.

**Table S6.** Instructor and Operational Demand Scores across OSEs.

| **Sport** | **Score** | **Normalized Score** | **Rationale/Comment** |
| --- | --- | --- | --- |
| Tennis | 3 | 0.507 | Basic instructor support sufficient; experienced players can self-practice in clubs, but beginners may need coaching. |
| Table tennis | 4 | 1.000 | Low supervision required; local club implementation feasible; self-directed practice common. |
| Badminton | 3 | 0.507 | Basic instructor support sufficient; local clubs provide beginner instruction; self-directed play feasible. |
| Basketball | 3 | 0.507 | Some coaching or referee presence required for organized play; basic skills instruction sufficient. |
| Volleyball | 3 | 0.507 | Basic coaching needed for beginners; organized teams require some operational support. |
| Soccer | 3 | 0.507 | Local club play requires minimal coaching; organized leagues need referees and safety supervision. |
| Baseball | 2 | 0.005 | Requires structured coaching and operational support, especially for youth or league play; safety and rules enforcement necessary. |
| Non-combat Judo | 2 | 0.005 | Expert supervision recommended for safety; instructor needed to guide kata execution and ensure correct techniques. |

Abbreviations: OSE, Open-Skill Exercise.

**Table S7.** Continuity, Enjoyment and Personal Cost Scores across OSEs.

| **Sport** | **Score** | **Normalized Score** | **Rationale/Comment** |
| --- | --- | --- | --- |
| Tennis | 3 | 0.500 | Moderate physical and mental effort; doubles play increases social engagement; moderate equipment/court cost; continuation feasible for recreational players. |
| Table tennis | 4 | 1.000 | Low physical burden; minimal equipment and space; easily playable in clubs or at home; enjoyable and socially engaging in doubles. |
| Badminton | 3 | 0.500 | Moderate physical and mental effort; accessible in community gyms; moderate cost; doubles provide social motivation. |
| Basketball | 4 | 1.000 | Moderate-to-low burden in recreational play; social interaction and teamwork enhance enjoyment; widely accessible in community facilities. |
| Volleyball | 4 | 1.000 | Physical demands moderate; team-based cooperation enhances enjoyment; low-to-moderate cost; continuation feasible in gyms or outdoor courts. |
| Soccer | 3 | 0.500 | Requires larger field and some physical effort; team interaction increases enjoyment; moderate cost; continuation feasible in community settings. |
| Baseball | 2 | 0.005 | High operational and organizational demands; physical and mental effort can be high for beginners; team coordination required; cost higher; continuation more difficult. |
| Non-combat Judo | 3 | 0.500 | Moderate physical and mental effort; performed in pairs; low cost; requires some instruction for proper technique; continuation feasible with guidance. |

Abbreviations: OSE, Open-Skill Exercise.

**Table S8.** Applicability to VR and e-sports Environments Scores across OSEs.

| **Sport** | **Score** | **Normalized Score** | **Rationale/Comment** |
| --- | --- | --- | --- |
| Tennis | 3 | 0.667 | Partial cognitive and tactical elements can be simulated; physical replication (stroke, movement) limited in VR. |
| Table tennis | 4 | 1.000 | Ball trajectory and racket control can be simulated digitally; some physical engagement preserved. |
| Badminton | 3 | 0.667 | Shuttlecock flight and tactical decisions partially replicable; full movement and physical intensity difficult. |
| Basketball | 4 | 1.000 | Shooting, passing, and basic team tactics can be simulated; physical exertion partially maintained. |
| Volleyball | 3 | 0.667 | Ball-handling and positioning partially replicable; full jumping and team coordination difficult. |
| Soccer | 3 | 0.667 | Tactical and strategic play partially replicable; full physical movement and ball control limited. |
| Baseball | 4 | 1.000 | Pitching, batting, and fielding can be simulated digitally; basic cognitive engagement preserved. |
| Non-combat Judo | 1 | 0.003 | Full-contact martial arts and partner synchronization cannot be fully simulated in VR; very low digital replicability. |

Abbreviations: VR, virtual reality; OSE, Open-Skill Exercise.
